# 1 Species traits predict extinction risk across the 2 Tree of Life

3 **Authors:** Filipe Chichorro<sup>1\*</sup>, Fernando Urbano<sup>1</sup>, Dinarte Teixeira<sup>12</sup> Henry Väre<sup>3</sup>, Tiago Pinto<sup>4</sup>, Neil  
4 Brummitt<sup>5</sup>, Xiaolan He<sup>3</sup>, Axel Hochkirch<sup>67</sup>, Jaakko Hyvönen<sup>3</sup>, Lauri Kaila<sup>3</sup>, Aino Juslén<sup>3</sup>, Pedro Cardoso<sup>1</sup>

## 5 **Affiliations:**

6 <sup>1</sup> Laboratory for Integrative Biodiversity Research (LIBRe), Finnish Museum of Natural History LUOMUS,  
7 University of Helsinki, PO Box 17, Pohjoinen Rautatiekatu 13, 00014 Helsinki, Finland

8 <sup>2</sup> Faculty of Life Sciences, University of Madeira, Penteada University Campus, 9020-105 Funchal,  
9 Portugal

10 <sup>3</sup> Finnish Museum of Natural History LUOMUS, University of Helsinki, PO Box 17, Pohjoinen Rautatiekatu  
11 13, 00014 Helsinki, Finland

12 <sup>4</sup> Mediterranean Institute for Agriculture, Environment and Development (MED), University of Évora,  
13 Mitra, 7002-554 - Évora, Portugal

14 <sup>5</sup> Department of Life Sciences, Natural History Museum, Cromwell Road, London SW7 5BD, UK

15 <sup>6</sup> Trier University, Department of Biogeography, D-54286 Trier, Germany

16 <sup>7</sup> IUCN SSC Invertebrate Conservation Committee, Trier University, Department of Biogeography, D-  
17 54286 Trier, Germany

18 \*corresponding author [filipe.chichorrodecarvalho@helsinki.fi](mailto:filipe.chichorrodecarvalho@helsinki.fi)

## 19 Summary

20 Biodiversity is eroding at unprecedented rates due to human activity<sup>1</sup>. Species' trajectories towards  
21 extinction are shaped by multiple factors, including life-history traits<sup>2</sup> as well as human pressures<sup>3</sup>.  
22 Previous studies linking these factors to extinction risk have been narrow in their taxonomic and  
23 geographic scope<sup>4</sup>, thus limiting the ability for identifying global predictors. We studied the relation  
24 between 12 traits and the extinction risk of almost 900 species representing 15 groups across the tree of  
25 life (vertebrates, invertebrates and plants) at a global scale. We show that threatened species share  
26 narrow habitat breadth, poor dispersal ability, low fecundity, small altitudinal range, and are affected by  
27 a large human footprint. Other traits either show contrasting responses among groups (body size,  
28 offspring size, and change in human footprint), or relations were found for only a limited number of taxa  
29 (generation length, diet breadth, microhabitat). Our study suggests that in the absence of data on the  
30 precise distribution and population trends of species, traits can be used as predictors of extinction risk  
31 and thus help guide future research, monitoring and conservation efforts.

## 32 Main

33 We are currently facing the sixth mass extinction at the planetary scale. Species are becoming extinct at  
34 rates 1000 to 10000 faster than background extinction rates<sup>1</sup>. Not only species, but functions they  
35 provide and that benefit humanity are at risk, with unpredictable consequences towards our own well-  
36 being. And yet, we are mostly unaware of what species are most at risk and why, with many becoming  
37 extinct even before description: the Centinelan extinctions. This lack of knowledge can be partly  
38 circumvented if we know which characteristics, or traits, are common to endangered species and which  
39 allow species to be resilient to anthropogenic change.

40 The vulnerability of species to extinction largely depends on their life-history strategies (intrinsic traits),  
41 and biotic and abiotic conditions species face (extrinsic traits)<sup>2,3,5</sup>. All studies linking the extinction risk of  
42 species to intrinsic and extrinsic factors have focused, however, on few species or narrow geographic  
43 ranges. Due to societal and knowledge biases<sup>6,7</sup>, well-studied groups include vertebrates, namely  
44 mammals<sup>2,3</sup> and birds<sup>8,9</sup> and the best-known region is the Palearctic realm<sup>4,10</sup>. The relations between  
45 traits and extinction risk across the tree of life have never been analyzed at a global taxonomic and  
46 geographic scale.

## 47 A global trait analysis

48 Here, we compiled a dataset of 12 traits commonly related to extinction risk (Table S1): body size,  
49 offspring size, fecundity, generation length, diet breadth, trophic level, dispersal ability, microhabitat,  
50 habitat breadth, altitudinal range, human footprint within the species range as of 2009<sup>11</sup>, and the  
51 relative change in human footprint over a period of 16 years (1993-2009)<sup>11</sup>. Traits were quantified for  
52 874 species in five groups of each of vertebrates (mammals, birds, reptiles, amphibians, and fishes),  
53 invertebrates (dragonflies, butterflies, grasshoppers, spiders and snails) and plants (bryophytes, ferns,  
54 gymnosperms, monocots and legumes) (Table S2-4). Each of the 15 taxonomic groups included 10  
55 species in each of six biogeographic realms, five threatened and five non-threatened, as long as data on  
56 extinction risk was available, namely global assessments in the International Union for the Conservation  
57 of Nature (IUCN) Red List of Threatened Species (see methods, Table S5). We used these data to identify  
58 global predictors of extinction risk across taxa and space.

59 For all groups, we first standardized trait values to ensure comparability. We then inspected the  
60 existence of relationships between traits with pair plots and Spearman rank correlations (Fig. S1). As no  
61 strong correlations were found we used all traits in subsequent analyses. We modelled the extinction  
62 risk as a binary response variable (threatened versus non-threatened following the IUCN Red List  
63 categories: threatened: EX, CR, EN, VU and NT, non-threatened: LC; note that our grouping is different  
64 from the usual for IUCN). Significant differences between threatened and non-threatened species were  
65 tested both within and for all taxonomic groups. Within groups, significant differences were detected  
66 with null models, by comparing the mean and the standard deviation of trait values of threatened  
67 species with a distribution of simulated data, sampled across all the possible values for that trait and  
68 group. We applied Bayesian mixed models to detect significant relationships between traits and  
69 extinction risk across taxa. The mixed models were used to relate threat status against each trait, while  
70 controlling for the non-independent effects of taxonomy (using the taxon grouping as a random effect in  
71 the models). We inferred significance in either positive or negative relationships between the extinction  
72 risk status and each trait when 95% of the posterior distributions of the estimates were not intercepting  
73 the zero value. We also related the geographical range size of species to extinction risk (Fig. S2), but we  
74 excluded it from further analyses because this trait is used to determine extinction risk in most IUCN Red  
75 List assessments. Moreover, range size itself may often not be the driver, but a consequence of  
76 trajectories towards extinction, such as population size and trend. Range and population size could only  
77 be used without circular reasoning if pre-disturbance values were known, which is almost invariably not  
78 the case.

79

80 **Predicting extinction risk**

81 Five traits were found to be consistently (similar sign across groups) and significantly ( $p < 0.05$ , or almost  
82 significantly,  $p < 0.1$ ) related with extinction risk (Table 1): habitat breadth, dispersal ability, fecundity,  
83 altitudinal range, and human footprint.

84 The association between habitat breadth and extinction risk was negative, highly significant (Table 1)  
85 and found across all taxa (Fig. 1). Species occurring in a narrower range of habitats have fewer  
86 opportunities to expand to and survive in alternative suitable living conditions and are consequently  
87 more likely to be threatened<sup>12,13</sup>. In fact, habitat breadth, together with geographical range size and  
88 abundance, is one of the three classical dimensions of rarity<sup>14</sup>. In a previous meta-analysis<sup>4</sup> habitat  
89 breadth was the only factor, besides geographical range size, that was consistently found to correlate  
90 with extinction risk. This trait should be very relevant in the face of generalized natural ecosystem  
91 destruction with consequent habitat loss for numerous species. With increasing levels of habitat loss  
92 occurring across all biomes, species that adapt to alternative habitat types will inevitably fare better.

93 We identified a negative association between dispersal ability and extinction risk (Table 1), indicating  
94 that species with poor dispersal ability are more likely to be at risk than those dispersing easily. The  
95 pattern was common across tested taxa (mammals, birds, dragonflies, grasshoppers, spiders, and  
96 bryophytes) but stronger in grasshoppers, spiders and bryophytes (Fig. 1). In the face of localized  
97 threats, species with a better capacity to colonize new areas have a lower risk of extinction<sup>15,16</sup>.  
98 Consequently, species groups with high dispersal capability, such as birds and dragonflies, often have a  
99 lower number of threatened species compared to other groups. In addition, shifts in species'  
100 distributions caused by climate change are likely to exacerbate the extinction of poor dispersers<sup>17,18</sup>. This  
101 trait might be very relevant in predicting which species will be able to adapt to increasing levels of  
102 fragmentation of natural habitats. As fragmentation is one of the consequences of habitat loss, its  
103 effects are increasing at global scales, and having good dispersal ability might prove crucial to the  
104 survival of many species.

105 The model relating fecundity to extinction risk included mostly data from vertebrates (mammals, birds,  
106 reptiles, amphibians, and fishes) and one invertebrate group (snails, table S3). Fecundity was negatively  
107 associated with extinction risk (Table 1), indicating that species with lower reproductive output are more  
108 at risk, with the strongest signal for mammals (Fig. 1). Populations of species with low reproductive  
109 output are presumed to decline in the face of demographic threats, due to diminished capacity to  
110 compensate for higher mortality rates<sup>19</sup>. Mammal families with higher proportions of species threatened  
111 by hunting and fishing have smaller litter sizes<sup>20</sup>. Although our model for fecundity includes no plant  
112 species due to lack of data, it is likely that species with lower reproductive output are also more

113 threatened in plants<sup>21</sup>. Species with higher reproductive output will probably fare better in the future  
114 independently of any particular threat.

115 Altitudinal range, often a measure of climatic tolerance, was marginally negatively correlated with  
116 extinction risk (Table 1). The modest significance of this trait could be a consequence of the small  
117 number of species for which data were available. The signal was stronger for bryophytes and, to some  
118 extent, butterflies (Fig. 1). Species with lower climate tolerance have fewer chances to be able to exploit  
119 new ranges for survival, and thus confronting higher extinction risk<sup>22</sup>. This trait in particular might be  
120 very relevant during the current climate emergency, as it might indicate which species will be able to  
121 adapt in the future to changing temperature and precipitation patterns.

122 The human footprint index was positively related to extinction risk (Table 1), indicating that species with  
123 higher mean human pressure within their ranges are more likely to be threatened. The pattern was  
124 consistent across taxa, but stronger in birds, dragonflies, snails and bryophytes (Fig. 1). This result was  
125 expected and reflects the fact that most organisms, independently of their traits, are sensitive to human  
126 pressure. Synanthropic or bred/cultivated species are obvious exceptions, benefiting from human  
127 pressure across their range<sup>23</sup>.

128 While the previous five traits were found to be global predictors of extinction risk, some were found to  
129 differ in their signal according to the species group (Supplementary discussion). They either showed  
130 contrasting responses between groups (body size, offspring size, and change in human footprint) or  
131 relations were found for only a limited number of taxa (generation length, diet breadth, microhabitat).  
132 In some cases a similar trait might in fact reflect different competitive advantages depending on the  
133 group, such as larger body sizes being targeted by hunting in the case of mammals and birds, but  
134 constituting a competitive advantage for many plant taxa<sup>4</sup>. In other cases, either data are missing or  
135 have little contrast for some taxa, preventing general trends to be found. Future studies with more data  
136 might help clarify and further support some of the trends already found.

137

## 138 Future directions

139 In this work, we were able to study the relationships between all the main traits found in the past to  
140 influence extinction risk, and the threat level of species covering numerous branches of the tree of life  
141 from many parts of the world. Notable exceptions are fungi and marine taxa, for which knowledge is  
142 scarcer. Inevitably, there are still gaps in both the knowledge available on traits (e.g. fecundity, dispersal

143 ability) in some taxa and of geographic coverage (mainly tropical species) in others. Yet, our results are  
144 not only robust, but also generalizable for a wide spectrum of terrestrial organisms.

145 Our study supports the view that extinctions do not affect species randomly, but extinctions are rather  
146 mediated by species traits<sup>23</sup>. We show that across the tree of life, species with a higher extinction risk  
147 are those with narrow habitat and climatic niches, poor dispersal capacity, and low fecundity. On top of  
148 this, the presence of human activity increases the probability that the species become threatened.  
149 These results emphasize two different aspects of extinction: firstly, with species extinctions, we might  
150 not only lose species but also their particular functions in ecosystems, which in turn, could lead to  
151 further co-extinctions. Secondly, high human impact on ecosystems is generally not compatible with  
152 species survival.

153 With the understanding of key biological factors contributing to species vulnerability, we will be able to  
154 identify species that are more prone to extinction, even in the absence of data that are most commonly  
155 used but often unavailable, such as geographic range size or current population trends. These two  
156 factors have been considered as the most important for extinction assessments according to the IUCN  
157 Red List criteria. Yet, often they are unknown or biased, with figures above 50% Data Deficient species  
158 reported for invertebrates, which represent the vast majority of species<sup>24</sup>. Using traits as surrogates for  
159 extinction risk will help reduce this knowledge gap, allowing prioritization of future research, monitoring  
160 and conservation efforts.

161

162

163

164

165

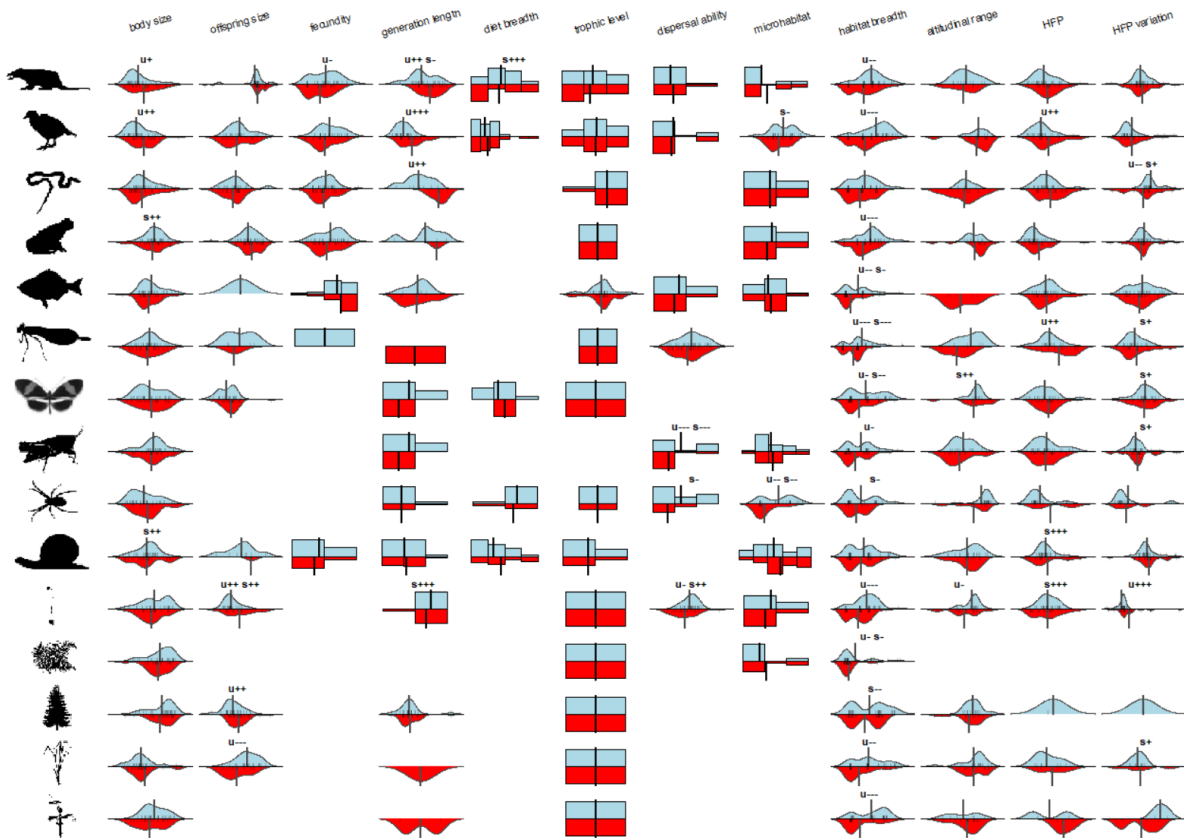

166

167 Figure 1: Beanplots of density of trait values between non-threatened (blue, upper side)  
 168 (red, lower side) species. Small vertical bars represent one species' value; darker bars indicate several  
 169 species with the same trait value. The large vertical bar is the mean trait value. Null models show  
 170 whether the mean (u) or standard deviation (s) of trait value of threatened species is higher (+++, ++, +)  
 171 or lower (---, --, -) than expected. Significance codes: +++ or ---  $x < 0.01$ ; ++ or --  $0.01 \leq x < 0.05$ ; + or -  
 172  $0.05 \leq x < 0.1$ .

173

174

175 **Table 1:** Results of the MCMCglms relating the value of each trait with extinction risk.

| Trait                     | Sign | pMCMC    | N species |
|---------------------------|------|----------|-----------|
| Body size                 | 0    | 0.666    | 825       |
| Offspring size            | 0    | 0.182    | 438       |
| Fecundity                 | -    | 0.0467   | 333       |
| Generation length         | 0    | 0.384    | 340       |
| Diet breadth              | 0    | 0.77689  | 214       |
| Trophic level             | 0    | 0.689    | 266       |
| Dispersal ability         | -    | 0.00543  | 335       |
| Microhabitat              | 0    | 0.802    | 545       |
| Habitat breadth           | -    | <0.0001  | 874       |
| Altitudinal range         | -    | 0.0653   | 314       |
| Human footprint           | +    | 0.000857 | 561       |
| Change in Human footprint | 0    | 0.73131  | 561       |



## 177 **Supplementary materials**

### 178 **Methods**

179 Because our goal was to find general trends, we selected 1) species belonging to a variety of taxonomic  
180 groups covering most of the multicellular tree of life (vertebrates, invertebrates and plants), and 2) traits  
181 that were generalizable across taxa, not considering others that would be specific for some groups (e.g.,  
182 brain size).

183

### 184 **Selection of species**

185 As a first step in selecting the species, we identified a range of taxa that would capture a wide range of  
186 life-histories and geographical locations. We restricted our species pool to the species already assessed  
187 for the global IUCN Red List of Threatened Species™ ([www.iucnredlist.org](http://www.iucnredlist.org)), excluding those that were  
188 assessed as Data Deficient. We also restricted our analysis to the multicellular branch of the tree of life.  
189 Since very few assessments of fungi exist, we also excluded these. Finally, we restricted the analysis to  
190 terrestrial and freshwater species given that the few marine species assessed would require different  
191 stratified sampling and analyses. We therefore chose five vertebrate, five invertebrate, and five plant  
192 groups. Vertebrate groups comprised “Mammals” (Class: Mammalia), “Birds” (Class: Aves), “Reptiles”  
193 (Class: Reptilia), “Amphibians” (Class: Amphibia) and freshwater “Fishes” (Class: Actinopterygii). The  
194 invertebrate groups comprised “Dragonflies” (Order: Odonata, including damselflies), “Butterflies”  
195 (Suborder: Rhopalocera), “Grasshoppers” (Order: Orthoptera), “Spiders” (Order: Araneae), and land  
196 “Snails” (Class: Gastropoda). In the selection of the plants we followed the recent baseline study<sup>25</sup> with  
197 the following embryophytes (land plants): “bryophytes”, excluding hornworts (Divisions: Bryophyta and  
198 Marchantiophyta), “pteridophytes” (Classes: Lycopodiopsida, Polypodiopsida), “Gymnosperms”  
199 (Classes: Pinopsida, Cycadopsida, Gnetopsida), “Monocots” (Class: Liliopsida), and finally the “Legumes”  
200 (Order: Fabales) serving as a representative of the largest group of plants, eudicots (Table S5).

201 To guarantee global spatial representativeness of the dataset, we selected, whenever possible, 10  
202 species per group from each of six biogeographic realms (Table S5). Of the 10 species, we randomly  
203 selected from the global IUCN database equal numbers of threatened (one of each of Near Threatened,  
204 Vulnerable, Endangered, Critically Endangered or Extinct) and non-threatened (five Least Concern)  
205 species.

206 As not all taxa have global coverage in the IUCN Red List, we had to restrict our dataset to smaller  
207 regions in the case of butterflies, grasshoppers, spiders, snails, and bryophytes. All species of spiders,  
208 snails and bryophytes were selected from Europe, due to very low numbers of assessments from other  
209 geographical realms. For grasshoppers, most assessments came from the Afrotropics and Palearctic, and  
210 therefore 30 species were selected from each. In butterflies, no Nearctic species were included due to  
211 unavailability of data from that group by the time we made the selection (IUCN version 2018-2), and  
212 very few from the Indo-Malay region were included. In total, our dataset included 874 species.

## 213 **Selection of traits**

214 As predictors, we selected intrinsic and extrinsic traits of species whose relationship with extinction risk  
215 has been hypothesized and tested in previous studies for some taxonomic groups (Table S1) but  
216 excluded traits that are specific to a few taxa only (e.g. brain size). Intrinsic trait data were compiled  
217 from the literature, including existing trait databases, and in some cases also measurements of  
218 photographs of pinned specimens (usually the holotype or paratype of species) available online.

219 Different taxonomic groups differ in their life-history and ecological strategies. Therefore, for each  
220 intrinsic trait, we selected trait “proxies” (Table S3), which are analogous traits<sup>26</sup> with the same function  
221 across taxa but measured differently. The choice of proxies depended on the suitability of the trait as a  
222 proxy (e.g., body length is a better proxy of body size than body mass in birds, due to large variation  
223 within a species between seasons), and on the availability of data for that trait (e.g. dispersal ability of  
224 birds and mammals being a binary trait distinguishing migratory and/or nomadic species from those not,  
225 an ordinal trait reflecting the propensity to balloon in spiders and a continuous trait of seed size in  
226 plants).

227 To measure the human footprint pressure and the change in human footprint within each species’  
228 range, we used recently constructed 1km<sup>2</sup> resolution raster maps of human footprint available for the  
229 years 1993 and 2009<sup>11</sup>. In these maps, each raster cell is characterized by a score of cumulative human  
230 footprint pressure, ranging from 0 (no human impact) to 50 (very high human impact). The score of a  
231 grid cell is a function of the presence and/or magnitude of eight types of pressures: the extent of built  
232 environments, human population density, electric infrastructure, crop lands, pasture lands, roads,  
233 railways and navigable waterways<sup>11</sup>. To estimate the mean human footprint of 2009 across a species’  
234 range, we averaged all grid cell values within each species polygon maps, retrieved from IUCN (see  
235 below). To estimate the change in human footprint, we first constructed a map of the differences  
236 between 2009 and 1993, with positive values indicating a positive change in human footprint (more  
237 human impact in 2009 compared to 1993) and negative values indicating negative change, and then  
238 averaged the scores across species’ ranges. The species’ range maps were obtained from the IUCN Red

239 List of Threatened Species. We only included maps with the following origin, presence, and seasonal  
240 descriptors: “Native” or “Reintroduced”; “Extant”, “Probably extant”, or “Possibly extant”; and  
241 “Resident”, “Breeding season”, “Non-breeding season” or “Seasonal presence uncertain”.

242 When no trait data were available for the species, we used either the value of a closely related species  
243 or the genus or family average; this latter approach was used when values for other taxa were available  
244 in online trait databases. Genus and family averaging were never performed for binary data, habitat  
245 breadth, altitudinal range, human footprint, change in human footprint, and geographical range size  
246 variables.

247 Some groups lacked data completely for some traits, such as fecundity and offspring size for dragonflies  
248 and spiders, and diet breadth for reptiles and amphibians. Trophic level was known for all species but in  
249 some groups the trophic position resolution was finer (fishes), while for some others it was coarse or  
250 invariant (dragonflies, spiders, plants).

251 Because offspring size is highly correlated with body size, we used instead a relative metric of offspring  
252 size: the residuals of a regression between  $\log(\text{offspring size})$  and  $\log(\text{body size})$  within all groups.

253 Because the altitudinal range is often related to the geographical range size of species, we used the  
254 residuals of a regression between  $\log(\text{altitudinal range})$  and the  $\log(\text{geographical range size})$ .

255 The compiled dataset included data for 94% and 99% of the species for body size and habitat breadth,  
256 respectively (Table S2). Particularly for invertebrate and plant species, data availability for some traits  
257 was low, including offspring size (mean 50%, range 0% to 100%), fecundity (38%, 0-100%), generation  
258 length (39%, 0-100%), diet breadth (24%, 0-100%), or dispersal ability (38%, 0-100%). The human  
259 footprint and the change in human footprint were available for 64% of species, since species’ maps are  
260 available for many of the species on the IUCN website.

## 261 **Trait transformation and standardization**

262 We log-transformed count data (e.g. number of habitat types, number of diet types eaten), and  
263 continuous data (body length, number of offspring), except the dispersal ability of dragonflies and  
264 bryophytes, and residuals of offspring size and altitudinal range, since these traits were already log-  
265 transformed when estimating their values. This ensured that the distribution of trait values followed a  
266 near-normal distribution without observations spread far away from the main density of trait values. For  
267 extinct species, which have geographical range sizes of 0 km<sup>2</sup>, we replaced these 0’s with 0.1, so that  
268 log-transformation of these data points was possible. Likewise, altitudinal range values lower than 10m  
269 were converted to 10m.

270 Within a given trait, the units and measurement scales were different across groups and it was  
271 necessary to transform these data to guarantee comparability between taxa. All trait values within  
272 groups were subject to a z-transformation, which includes rescaling of data (by dividing each data point  
273 by the standard deviation) and recentering by subtracting the mean value from each observation. This  
274 type of scaling preserves the mean and standard deviation of each trait.

## 275 **Statistical analysis**

276 We first modelled each trait separately (univariate models) per group. To check for significant  
277 relationships between each trait distribution and extinction risk within groups, we ran null models. The  
278 null model compared the mean and the standard deviation of the trait values of the threatened species  
279 with the mean and standard deviation of 1000 null expectations when extracting the same number as  
280 threatened species from the complete pool of threatened plus non-threatened. A deviation from the  
281 null expectation was considered to have been met when either the mean or the standard deviation of  
282 the threatened species were lower or higher than the 2.5<sup>th</sup> or the 97.5<sup>th</sup> percentiles of the null  
283 distribution, in which case a significant negative or significant positive deviation was annotated  
284 respectively.

285 To test the relation between individual traits and extinction risk across taxa we used generalized linear  
286 mixed effect models (GLMMs), in which we controlled the effect of taxonomy by allowing a random  
287 intercept and random slope dependent on the taxonomic group. Since our response variable was binary,  
288 our GLMM consisted of a logistic regression. The GLMMs were modelled within a Bayesian framework,  
289 using Monte Carlo Markov Chains with R package MCMCglmm<sup>27</sup>. We used the default priors of package  
290 MCMCglmm, which are weak priors. We ran simulations with 50,000,000 iterations, excluding the first  
291 1,000,000 (burn-in). To ensure good mixing of chains, we only saved every 1000<sup>th</sup> iteration (thinning).  
292 With these parameters, we observed good mixing of chains and thus, good convergence of posterior  
293 parameters' distributions.

294 The random terms in the model add a new assumption to the overall model, which is that taxonomic  
295 groups are sampled from a larger population of possible taxonomic groups and that the intercepts and  
296 slopes of each group follow a normal distribution of intercepts and slopes around the population means  
297 of the intercept and slope. The association between the trait and the probability of being threatened  
298 was considered to be strong when 95% of the posterior distribution of a trait was not intercepting zero,  
299 and moderate for 90%. All statistical analyses were performed in R version 3.6.1<sup>28</sup>. Beanplots were done  
300 with package beanplot<sup>29</sup> and pairwise plots with packages ggplot2<sup>30</sup> and GGally<sup>31</sup>.

301

302

## 303 **Supplementary discussion**

304 The distribution of body size values differed between threatened and non-threatened species in birds,  
305 amphibians, snails, and marginally in mammals (Fig. 1). Overexploitation might explain the trends for  
306 mammals and birds, as larger species are direct targets of hunting<sup>20,32</sup>. Particularly for mammals, as size  
307 increases the importance of life-history traits in determining extinction risk increases in relation to  
308 extrinsic traits<sup>33</sup>. Larger species within these generally large body-sized taxa (compared with, e.g.,  
309 insects) also require more resources and these might quickly dwindle to unsustainable levels<sup>33</sup>. In  
310 amphibians and snails, the standard deviations of body size values of threatened species were  
311 significantly greater than the null expectation (Fig. 1), indicating that a larger proportion of threatened  
312 species occur at both ends of the body size distribution for these groups. The conservation status of  
313 small body-sized organisms could be explained by a particular set of life-history traits that may  
314 predispose them to naturally restricted range size and narrow habitat breadth<sup>34</sup>.

315 After accounting for body size, the relative offspring size of organisms showed mixed signals across taxa,  
316 with the only significant values being found for plant groups, albeit with opposing signals (Fig. 1). In  
317 bryophytes and gymnosperms offspring size was positively correlated with extinction risk, while for  
318 monocots this relationship was negative. The size of an offspring in relation to the body size is an  
319 indication of the investment in reproduction. The trade-off is between small and numerous, or large and  
320 scarce. Larger species tend to invest more in large offspring, to compensate for higher mortality during a  
321 very long juvenile stage<sup>35</sup>. However, when environmental conditions change rapidly, investing in only a  
322 few descendants might be a bad option due to low variability under unpredictability. For monocots the  
323 negative relation might be because 19 species in the dataset are orchids, which are characterized by the  
324 smallest seeds among plants<sup>35</sup>. Orchids have very specific requirements for survival (their seeds require  
325 the presence of mycorrhizal fungi to germinate) and therefore this relationship might be spurious and  
326 phylogenetically driven, even if orchids are in fact generally in higher threat categories than most other  
327 plant groups.

328 The change in human footprint indicates the rate of increase or decrease of human footprint in species'  
329 ranges, with higher positive values showing a greater increase in impact, and higher negative values  
330 showing a greater decrease in impact. Its influence on extinction risk was diverse, with no congruent  
331 pattern across taxa (Fig. 1). Threatened bryophytes were characterized by significantly larger positive  
332 changes in human footprint values than non-threatened bryophytes, while threatened reptiles were  
333 characterized by significantly larger negative changes than non-threatened reptiles. This might be due to  
334 recent impacts leading to large differences in the index that are still to be reflected in species

335 populations. The absence of a global trend indicates that the magnitude, rather than the rate of change  
336 in human footprint is related to extinction risk.

337 Generation length had a very clear relationship with extinction risk for mammals, birds and reptiles (Fig.  
338 1). Just as with fecundity, species with delayed life-cycles are more likely to be more threatened. For  
339 organisms with slower life-cycles it takes longer to recover from low population numbers in the face of  
340 demographic troughs<sup>19</sup>. The weak or nonexistent effect seen in invertebrates or plants taxa may be due  
341 to lack of contrasts in data (either few data available, available just as ordinal values or showing low  
342 natural variability).

343 The mean diet breadth between threatened and non-threatened species did not vary across groups (Fig.  
344 1). However, the range of values differed between threatened and non-threatened mammals, indicating  
345 that threatened species occurred at both ends of the range in diet breadth. As for seed size, phylogeny  
346 might be playing a role, as diet specialists have been shown to be more at risk within bats<sup>36</sup>, but not  
347 within artiodactyls<sup>37</sup> for example. Further studies including the phylogenetic relations of species would  
348 help clarify any general effects of diet breadth on extinction risk. As comprehensive phylogenetic trees  
349 are currently available for only some of the taxa we studied this is not possible as of yet.

350 Microhabitat was a significant factor only for spiders (Fig. 1); spiders occurring at higher vertical strata  
351 are less threatened. This effect seems to be due to the presence of organisms with higher capacity for  
352 ballooning in this stratum. As ballooning depends on, first, building the right kind of silk strands (more  
353 commonly found in web weavers) and second, finding the right place to take off (usually at higher  
354 heights) spiders living on trees and other vegetation are often more prone to balloon than those living at  
355 ground level<sup>38</sup>. Microhabitat therefore determines to a certain point dispersal ability and consequently  
356 extinction risk in spiders.

357

## 358 **Supplementary tables**



359

360 Table S1: Traits studied, definition, examples, and hypotheses.

| Trait             | Definition                                                       | Examples of traits                                                                  | Hypothesis                                                                                                                                                                                                                                                                                                                                                | References  |
|-------------------|------------------------------------------------------------------|-------------------------------------------------------------------------------------|-----------------------------------------------------------------------------------------------------------------------------------------------------------------------------------------------------------------------------------------------------------------------------------------------------------------------------------------------------------|-------------|
| Body size         | Typical size of an adult organism.                               | body mass, body length, plant height, plant mass, shell length                      | Larger organisms are more vulnerable because 1) they tend to have lower population densities, 2) require more resources; and 3) slower life cycles.                                                                                                                                                                                                       | 4           |
| Offspring size    | Typical size of an offspring.                                    | size at birth, egg size, seed size                                                  | Organisms with larger offspring than expected by body size are more vulnerable to extinction because offspring size is often correlated with lower fecundity and slower life cycles with less capacity to adapt to new conditions.                                                                                                                        | 4           |
| Fecundity         | Reproductive output.                                             | Number of offspring per reproductive event, number of reproductive events in a year | Species with larger fecundities can compensate for the effects of higher mortality rates, particularly in the face of changing environment.                                                                                                                                                                                                               | 4           |
| Generation length | Typical length of the life cycle, from birth until reproduction. | generation length, age at maturation, max longevity                                 | Species with slow life cycles are more vulnerable to extinction, due to their weaker capacity to recover normal population numbers after a disturbance.                                                                                                                                                                                                   | 4           |
| Diet breadth      | Degree of narrowness of diet or of substrate used                | Number of food types ingested, diversity of prey, breadth of soil conditions        | Species with narrow diet breadths are more vulnerable because they are less able to shift diets when resource abundance fluctuates or decreases.                                                                                                                                                                                                          | 26,41       |
| Trophic level     | Trophic position                                                 | herbivore/omnivore/carnivore                                                        | Organisms at higher trophic levels are more vulnerable because biomass available is reduced. Furthermore, they are affected by disturbance at lower trophic levels.                                                                                                                                                                                       | 4           |
| Dispersal ability | Capacity to disperse                                             | Migrant? or not, dispersal speed, dispersal distance                                | Organisms with low dispersal ability are more vulnerable because they do not have the mechanisms to find suitable habitat around a changing environment.                                                                                                                                                                                                  | 22,27,42,43 |
| Microhabitat      | Typical vertical stratum occupied in a habitat.                  | nest position, foraging stratum, vertical position in the water column              | Organisms that occupy lower strata in a habitat are more likely to face less extinction risk because they are less dependent on other species providing them verticality (like trees, bushes, etc.). On the other hand, species living on the ground may face higher predation pressure. Benthic organisms may be more vulnerable than those in the water | 44,45       |

column due to loss of good quality  
substratum and benthic vegetation.

|                           |                                                    |                                                                                                                                    |                                                                                                                                                                                            |      |
|---------------------------|----------------------------------------------------|------------------------------------------------------------------------------------------------------------------------------------|--------------------------------------------------------------------------------------------------------------------------------------------------------------------------------------------|------|
| Habitat breadth           | Range of habitat types occupied.                   | number of habitat types                                                                                                            | Species capable of occupying a broad range of habitats are less likely to become extinct, because they may shift preferential habitat when one is reduced.                                 | 14   |
| Altitudinal range         | Range of altitude levels occupied.                 | Vertical distance between lower and higher limits                                                                                  | Species with broader altitudinal ranges are able to adapt to different altitudinal strata and shift or survive in different altitudes when conditions change.                              | 46   |
| Human footprint           | Degree of human footprint within the range.        | mean human footprint within the range, mean human population density, road density                                                 | Species living in areas with higher human influence are more likely to be threatened due to increased levels of habitat fragmentation, exploitation levels, etc.                           | 5,30 |
| Change in human footprint | Degree of human footprint change within the range. | Mean increase in human footprint change within the range, mean increase in human population density, mean increase in road density | Species living in areas in which human presence has increased in recent years are more likely to be threatened due to increased levels of habitat fragmentation, exploitation levels, etc. | 5    |

361

362

363 **Table S2:** Number of species for each trait in each taxonomic group.

|              | <b>Body size</b> | <b>Offspring size</b> | <b>Fecundity</b> | <b>Generation length</b> | <b>Diet breadth</b> | <b>Trophic level</b> | <b>Dispersal ability</b> | <b>Microhabitat</b> | <b>Habitat breadth</b> | <b>Altitudinal range</b> | <b>Human footprint</b> |
|--------------|------------------|-----------------------|------------------|--------------------------|---------------------|----------------------|--------------------------|---------------------|------------------------|--------------------------|------------------------|
| <i>Total</i> | 842              | 415                   | 334              | 344                      | 214                 | 743                  | 335                      | 551                 | 874                    | 314                      | 562                    |
| Mammals      | 60               | 59                    | 58               | 58                       | 59                  | 60                   | 35                       | 60                  | 59                     | 16                       | 55                     |
| Birds        | 59               | 0                     | 58               | 59                       | 60                  | 60                   | 60                       | 60                  | 60                     | 17                       | 50                     |
| Reptiles     | 60               | 43                    | 60               | 11                       | 0                   | 45                   | 0                        | 44                  | 59                     | 15                       | 51                     |
| Amphibians   | 60               | 60                    | 60               | 6                        | 0                   | 18                   | 0                        | 57                  | 60                     | 21                       | 55                     |
| Fishes       | 60               | 2                     | 56               | 9                        | 0                   | 59                   | 29                       | 60                  | 60                     | 5                        | 51                     |
| Dragonflies  | 60               | 5                     | 1                | 1                        | 0                   | 60                   | 60                       | 0                   | 60                     | 7                        | 34                     |
| Butterflies  | 59               | 47                    | 0                | 10                       | 17                  | 60                   | 0                        | 0                   | 60                     | 19                       | 44                     |
| Grasshoppers | 51               | 0                     | 0                | 5                        | 0                   | 0                    | 60                       | 60                  | 60                     | 27                       | 56                     |
| Spiders      | 39               | 0                     | 0                | 39                       | 39                  | 39                   | 39                       | 39                  | 39                     | 36                       | 33                     |
| Snails       | 60               | 9                     | 41               | 39                       | 39                  | 42                   | 0                        | 59                  | 60                     | 29                       | 56                     |
| Bryophytes   | 52               | 46                    | 0                | 60                       | 0                   | 60                   | 52                       | 59                  | 60                     | 36                       | 57                     |
| Ferns        | 50               | 0                     | 0                | 0                        | 0                   | 60                   | 0                        | 53                  | 60                     | 0                        | 0                      |
| Gymnosperms  | 58               | 57                    | 0                | 44                       | 0                   | 60                   | 0                        | 0                   | 60                     | 32                       | 1                      |
| Monocots     | 60               | 41                    | 0                | 1                        | 0                   | 60                   | 0                        | 0                   | 59                     | 32                       | 14                     |
| Legumes      | 54               | 46                    | 0                | 2                        | 0                   | 60                   | 0                        | 0                   | 58                     | 22                       | 5                      |

364

365

Table S3: Table of proxies used for each trait. A “-” indicates traits for which we could not find enough data/proxies.

| Group      | Body size              | Offspring size                                                                                             | Fecundity                      | Generation length              | Diet breadth         | Trophic level                              | Dispersal ability                                      | Microhabitat                                                                                                                                                                                        |
|------------|------------------------|------------------------------------------------------------------------------------------------------------|--------------------------------|--------------------------------|----------------------|--------------------------------------------|--------------------------------------------------------|-----------------------------------------------------------------------------------------------------------------------------------------------------------------------------------------------------|
| Mammals    | Adult body mass (g)    | Neonatal mass (g)                                                                                          | Litter size (no. of offspring) | Maximum longevity (years)      | Number of food types | 1 = herbivore; 2 = omnivore; 3 = carnivore | 1 = not a migrant; 2 = nomadic; 3 = migrant or nomadic | Foraging stratum: 1 = marine; 2 = ground level, including aquatic foraging; 3 = scansorial; 4 = arboreal; 5 = aerial; categories from Elton traits database <sup>47</sup>                           |
| Birds      | Body length (cm)       | Egg volume (mm <sup>3</sup> ), estimate from egg height and diameter using the Hoyt equation <sup>48</sup> | Clutch size (no. of offspring) | Generation length (years)      | Number of food types | 1 = herbivore; 2 = omnivore; 3 = carnivore | 1 = Not a migrant; 2 = altitudinal/full migrant        | Index of foraging verticality from 0 (prevalence of foraging below water) to 1 (prevalence of foraging well above vegetation or other structures). Adapted from Elton traits database <sup>47</sup> |
| Reptiles   | Adult body mass (g)    | hatchling snout-vent length (mm)                                                                           | Clutch size (no. of offspring) | Generation length (years)      | -                    | 1 = herbivore; 2 = omnivore; 3 = carnivore | -                                                      | Verticality: 1 = ground level (ground dwelling, among rocks, freshwater, leaf litter); 2 = upper level                                                                                              |
| Amphibians | Snout-vent length (mm) | Offspring size (mm)                                                                                        | Clutch size (no. of offspring) | Age at sexual maturity (years) | -                    | 1 = carnivore                              | -                                                      | Verticality: 1 = exclusively ground level/aquatic; 2 = arboreal or arboreal and/or aquatic and/or terrestrial)                                                                                      |

|              |                                                                      |                     |                                                                                                                      |                                                           |                                                                                                      |                                                            |                                                                                    |                                                                                                             |
|--------------|----------------------------------------------------------------------|---------------------|----------------------------------------------------------------------------------------------------------------------|-----------------------------------------------------------|------------------------------------------------------------------------------------------------------|------------------------------------------------------------|------------------------------------------------------------------------------------|-------------------------------------------------------------------------------------------------------------|
| Fishes       | Body length (cm)                                                     | egg diameter (mm)   | Minimum population doubling time: 1= more than 14 years; 2= 4.5-14 years; 3 = 1.4-4.4 years; 4 = less than 15 months | Generation length (years)                                 | -                                                                                                    | trophic position (average $\delta^{15}\text{N}$ signature) | Migrant (binary, not a migrant/migrant)                                            | Water column verticality: 1 = demersal; 2 = benthopelagic; 3 = pelagic                                      |
| Dragonflies  | Hindwing length (mm)                                                 | Larval size (mm)    | number of eggs                                                                                                       | 1 = less than a year; 2 = more than a year                | -                                                                                                    | 1 = carnivore                                              | Residuals of $\log(\text{hindwing length})$ and $\log(\text{abdomen length})^{18}$ | -                                                                                                           |
| Butterflies  | Forewing length (mm)                                                 | Egg size (mm)       | Number of eggs                                                                                                       | 1 = one generation per year; 2 = two generations per year | 1 = monophagous; 2 = oligophagous; 3 = polyphagous                                                   | 1 = herbivore                                              | -                                                                                  | -                                                                                                           |
| Grasshoppers | Total length (mm)                                                    | -                   | Number of eggs                                                                                                       | 1 = less than one year; 2 = more than a year              | -                                                                                                    | -                                                          | 1 = flightless, 2 = dimorphic, 3 = winged                                          | 1 = troglobiont; 2 = terricolous; 3 = graminicolous/forbicolous; 4 = arbusticolous; 5 = arboricolous        |
| Spiders      | Body length (mm)                                                     | -                   | -                                                                                                                    | Generation length (years)                                 | 1 = stenophagous; 2 = euriphagous                                                                    | 1 = carnivore                                              | Ballooning frequency: 1 = rare; 2 = occasional; 3 = frequent                       | Verticality index (Macias-Hernandez et al. 2020)                                                            |
| Snails       | Heometric mean of the length and width of a shell (mm) <sup>49</sup> | Egg diameter (mm)   | 1 = 1-10 eggs; 2 = 10-100 eggs                                                                                       | 1 = 1-2 years; 2 = 2-5 years; 3 = >5 years                | Number of classes eaten. Classes = detritus/litter/living material/dead material/herbivore/carnivore | 1 = non-carnivore; 2 = carnivore                           | -                                                                                  | 0 = caves and other subterranean habitats; 1 = under-rocks, 2 = rock level; 3 = above rocks; 4 = vegetation |
| Bryophytes   | Shoot length (mm)                                                    | Spore diameter (um) | -                                                                                                                    | 1 = annual or biannual, 2 = perennial                     | -                                                                                                    | 1 = produce                                                | 1 / $\log(\text{spore size})^{21}$                                                 | 1 = exclusively soil/rock; 2 = trees/walls/tree logs                                                        |

|             |                |                                                         |   |                                 |   |                     |   |                                                                           |
|-------------|----------------|---------------------------------------------------------|---|---------------------------------|---|---------------------|---|---------------------------------------------------------------------------|
| Ferns       | Height<br>(cm) | -                                                       | - | -                               | - | 1 =<br>produce<br>r | - | 1 = terrestrial/aquatic; 2<br>= soil or epiphytes; 3 =<br>epiphytes/trunk |
| Gymnosperms | Height<br>(cm) | Seed max<br>diameter<br>(mm)                            | - | Generation<br>length<br>(years) | - | 1 =<br>produce<br>r | - | -                                                                         |
| Monocots    | Height<br>(cm) | Seed<br>weight<br>(Thousand<br>kernel<br>weight)<br>(g) | - | Generation<br>length<br>(years) | - | 1 =<br>produce<br>r | - | -                                                                         |
| Legumes     | Height<br>(cm) | Seed max<br>diameter<br>(mm)                            | - | Generation<br>length<br>(years) | - | 1 =<br>produce<br>r | - | -                                                                         |

---

Table S4: Proxies for Habitat breadth, Altitudinal range, Human footprint and Change in human footprint. All data extracted or derived from the IUCN Red List database.

| Habitat breadth         | Altitudinal range           | Human footprint (HFP)                          | Change in human footprint                           | Geographical range size                  |
|-------------------------|-----------------------------|------------------------------------------------|-----------------------------------------------------|------------------------------------------|
| Number of habitat types | Maximum - minimum elevation | Mean human footprint across geographical range | Mean change in HFP values across geographical range | Extent of Occurrence (km <sup>2</sup> ). |

**Table S5:** Number of species per taxonomic group and biogeographic realm.

|                     | Afrotropic | IndoMalay | Nearctic | Neotropic | Australasia | Palaearctic |
|---------------------|------------|-----------|----------|-----------|-------------|-------------|
| <b>Mammals</b>      | 10         | 10        | 10       | 10        | 10          | 10          |
| <b>Birds</b>        | 10         | 10        | 10       | 10        | 10          | 10          |
| <b>Reptiles</b>     | 10         | 10        | 10       | 10        | 10          | 10          |
| <b>Amphibians</b>   | 10         | 10        | 10       | 10        | 10          | 10          |
| <b>Fishes</b>       | 10         | 10        | 10       | 10        | 10          | 10          |
| <b>Dragonflies</b>  | 10         | 10        | 10       | 10        | 10          | 10          |
| <b>Butterflies</b>  | 10         | 2         | 0        | 16        | 16          | 16          |
| <b>Grasshoppers</b> | 30         | 0         | 0        | 0         | 0           | 30          |
| <b>Spiders</b>      | 0          | 0         | 0        | 0         | 0           | 39          |
| <b>Snails</b>       | 0          | 0         | 0        | 0         | 0           | 60          |
| <b>Bryophytes</b>   | 0          | 0         | 0        | 0         | 0           | 60          |
| <b>Ferns</b>        | 10         | 10        | 10       | 10        | 10          | 10          |
| <b>Gymnosperm</b>   | 10         | 10        | 10       | 10        | 10          | 10          |
| <b>s</b>            |            |           |          |           |             |             |
| <b>Monocots</b>     | 10         | 10        | 10       | 10        | 10          | 10          |
| <b>Fabales</b>      | 10         | 10        | 10       | 10        | 10          | 10          |



## Supplementary Figures

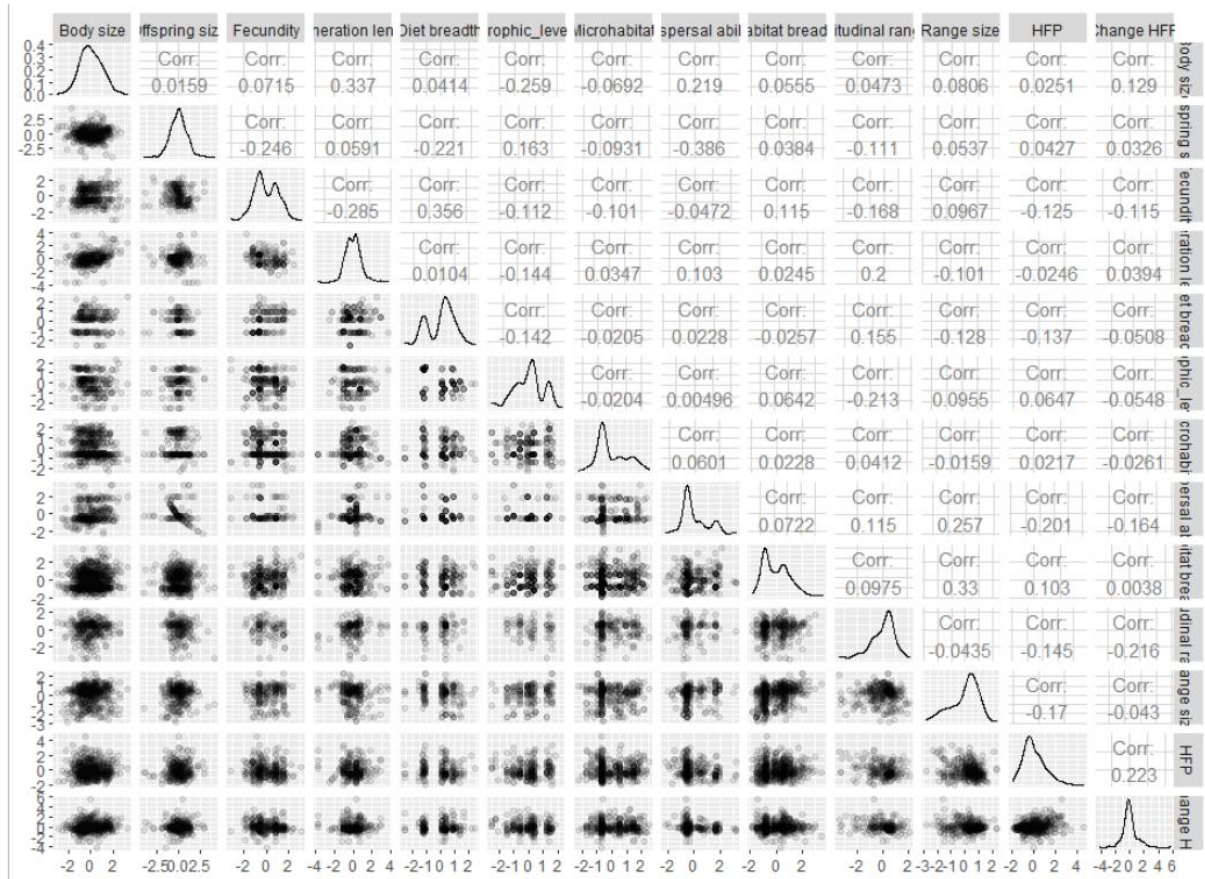

Figure S1: Pairwise correlations between traits. Upper panel: Spearman's rank correlation coefficient between each pair of traits. Diagonal: histogram of each trait. Lower panel: scatterplots of each trait. Higher density of datapoints is indicated by darker shades of gray.

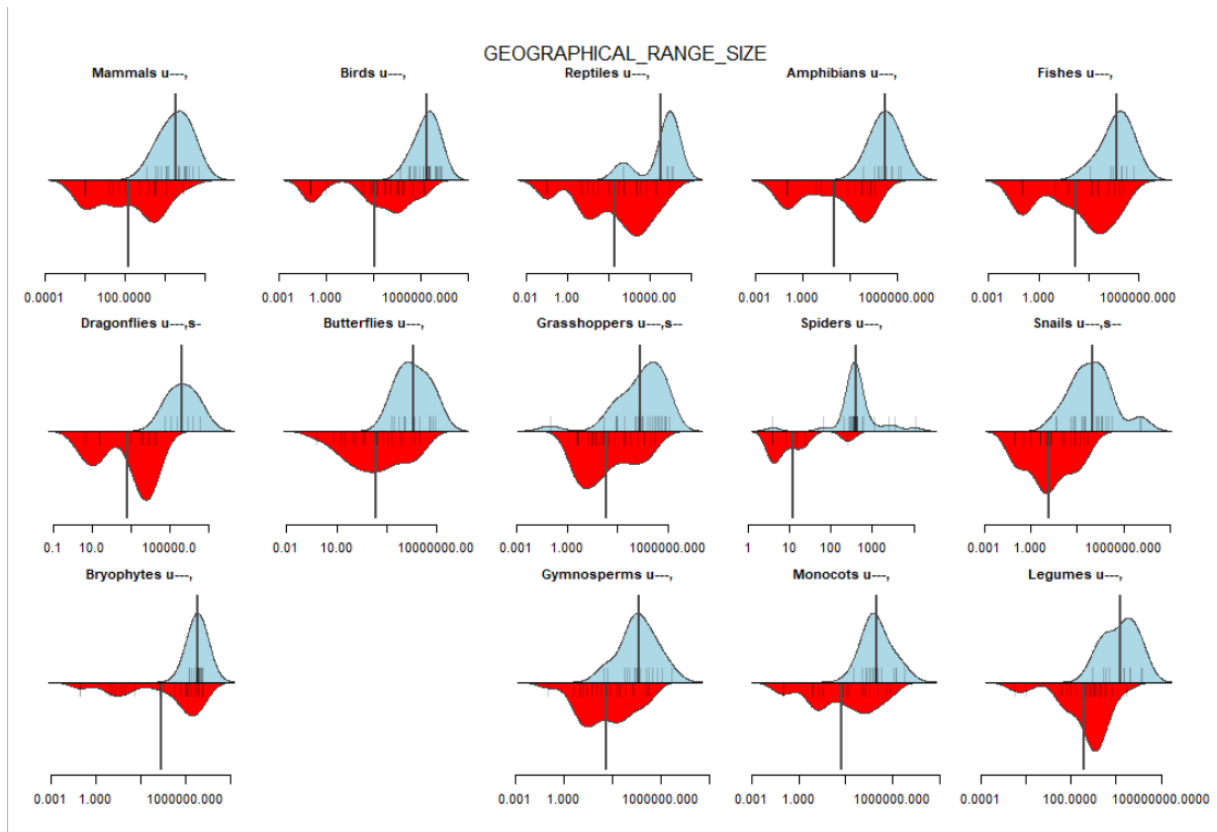

Figure S2: Beanplots of density of geographical range size values between non-threatened (blue, upper side) and threatened (red, lower side) species. Small vertical bars represent one species' value; darker bars indicate several species with the same trait value. The large vertical bar is the mean geographical range size value. Null models show whether the mean (u) or standard deviation (s) of threatened species is higher (+++, ++, +) or lower (---, --, -) than expected. Significance codes: +++ or ---  $x < 0.01$ ; ++ or --  $0.01 \leq x < 0.05$ ; + or -  $0.05 \leq x < 0.1$ . The Bayesian model was highly significant ( $p_{\text{MCMC}} < 0.0001$ ,  $N = 506$ ).



## References

1. Vos, J. M. D., Joppa, L. N., Gittleman, J. L., Stephens, P. R. & Pimm, S. L. Estimating the normal background rate of species extinction. *Conserv. Biol.* **29**, 452–462 (2015).
2. Purvis, A., Gittleman, J. L., Cowlishaw, G. & Mace, G. M. Predicting extinction risk in declining species. *Proc. R. Soc. Lond. B Biol. Sci.* **267**, 1947–1952 (2000).
3. Marco, M. D., Venter, O., Possingham, H. P. & Watson, J. E. M. Changes in human footprint drive changes in species extinction risk. *Nat. Commun.* **9**, 1–9 (2018).
4. Chichorro, F., Juslén, A. & Cardoso, P. A review of the relation between species traits and extinction risk. *Biol. Conserv.* **237**, 220–229 (2019).
5. Cardillo, M. *et al.* Human Population Density and Extinction Risk in the World’s Carnivores. *PLoS Biol* **2**, e197 (2004).
6. Cardoso, P., Erwin, T. L., Borges, P. A. V. & New, T. R. The seven impediments in invertebrate conservation and how to overcome them. *Biol. Conserv.* **144**, 2647–2655 (2011).
7. Verde Arregoitia, L. D. Biases, gaps, and opportunities in mammalian extinction risk research. *Mammal Rev.* **46**, 17–29 (2016).
8. Bennett, P. M. & Owens, I. P. Variation in extinction risk among birds: chance or evolutionary predisposition? *Proc. R. Soc. Lond. B Biol. Sci.* **264**, 401–408 (1997).
9. Gage, G. S., Brooke, M. de L., Symonds, M. R. E. & Wege, D. Ecological correlates of the threat of extinction in Neotropical bird species. *Anim. Conserv.* **7**, 161–168 (2004).
10. Nolte, D., Boutaud, E., Kotze, D. J., Schuldt, A. & Assmann, T. Habitat specialization, distribution range size and body size drive extinction risk in carabid beetles. *Biodivers. Conserv.* **28**, 1267–1283 (2019).
11. Venter, O. *et al.* Global terrestrial Human Footprint maps for 1993 and 2009. *Sci. Data* **3**, 160067 (2016).
12. Böhm, M. *et al.* Correlates of extinction risk in squamate reptiles: the relative importance of biology,

- geography, threat and range size. *Glob. Ecol. Biogeogr.* **25**, 391–405 (2016).
13. Slatyer, R. A., Hirst, M. & Sexton, J. P. Niche breadth predicts geographical range size: a general ecological pattern. *Ecol. Lett.* **16**, 1104–1114 (2013).
  14. Rabinowitz, D. Seven forms of Rarity. in *Biological aspects of rare plant conservation* 205–217 (John Wiley & Sons Ltd., 1981).
  15. Reinhardt, K., Köhler, G., Maas, S. & Detzel, P. Low dispersal ability and habitat specificity promote extinctions in rare but not in widespread species: the Orthoptera of Germany. *Ecography* **28**, 593–602 (2005).
  16. Benschoter, A. M. *et al.* Threatened and Endangered Subspecies with Vulnerable Ecological Traits Also Have High Susceptibility to Sea Level Rise and Habitat Fragmentation. *PLoS ONE* **8**, e70647 (2013).
  17. Mattila, N., Kaitala, V., Komonen, A., Pälvinen, J. & Kotiaho, J. S. Ecological correlates of distribution change and range shift in butterflies: Distribution decline in butterflies. *Insect Conserv. Divers.* **4**, 239–246 (2011).
  18. MacLean, S. A. & Beissinger, S. R. Species' traits as predictors of range shifts under contemporary climate change: A review and meta-analysis. *Glob. Change Biol.* **23**, 4094–4105 (2017).
  19. Pimm, S. L., Jones, H. L. & Diamond, J. On the Risk of Extinction. *Am. Nat.* **132**, 757–785 (1988).
  20. González-Suárez, M., Gómez, A. & Revilla, E. Which intrinsic traits predict vulnerability to extinction depends on the actual threatening processes. *Ecosphere* **4**, 1–16 (2013).
  21. Saar, L., Takkis, K., Pärtel, M. & Helm, A. Which plant traits predict species loss in calcareous grasslands with extinction debt? *Divers. Distrib.* **18**, 808–817 (2012).
  22. Botts, E. A., Erasmus, B. F. N. & Alexander, G. J. Small range size and narrow niche breadth predict range contractions in South African frogs. *Glob. Ecol. Biogeogr.* **22**, 567–576 (2013).
  23. McKinney, M. L. & Lockwood, J. L. Biotic homogenization: a few winners replacing many losers in the next mass extinction. *Trends Ecol. Evol.* **14**, 450–453 (1999).
  24. Seppälä, S. *et al.* Species conservation profiles of a random sample of world spiders IV: Scytodidae

- to Zoropsidae. *Biodivers. Data J.* **6**, e30842 (2018).
25. Brummitt, N. A. *et al.* Green Plants in the Red: A Baseline Global Assessment for the IUCN Sampled Red List Index for Plants. *PLOS ONE* **10**, e0135152 (2015).
  26. Weiss, K. C. B. & Ray, C. A. Unifying functional trait approaches to understand the assemblage of ecological communities: synthesizing taxonomic divides. *Ecography* **42**, 2012–2020 (2019).
  27. Hadfield, J. D. MCMC methods for multi-response generalized linear mixed models: The MCMCglmm R package. *J. Stat. Softw.* **33**, 1–22 (2010).
  28. R Core Team. *R: A language and environment for statistical computing.* (2019).
  29. Kampstra, P. Beanplot: A boxplot alternative for visual comparison of distributions. *J. Stat. Softw. Code Snippets* **28**, 1–9 (2008).
  30. Wickham, H. *ggplot2: Elegant graphics for data analysis.* (Springer-Verlag New York, 2016).
  31. Schloerke, B. *et al.* *GGally: Extension to 'ggplot2'.* (2020).
  32. Olden, J. D., Hogan, Z. S. & Zanden, M. J. V. Small fish, big fish, red fish, blue fish: size-biased extinction risk of the world's freshwater and marine fishes. *Glob. Ecol. Biogeogr.* **16**, 694–701 (2007).
  33. Cardillo, M. *et al.* Multiple Causes of High Extinction Risk in Large Mammal Species. *Science* **309**, 1239–1241 (2005).
  34. Ripple, W. J. *et al.* Extinction risk is most acute for the world's largest and smallest vertebrates. *Proc. Natl. Acad. Sci.* 201702078 (2017) doi:10.1073/pnas.1702078114.
  35. Moles, A. T. *et al.* A Brief History of Seed Size. *Science* **307**, 576–580 (2005).
  36. Boyles, J. G. & Storm, J. J. The Perils of Picky Eating: Dietary Breadth Is Related to Extinction Risk in Insectivorous Bats. *PLoS ONE* **2**, e672 (2007).
  37. Price, S. A. & Gittleman, J. L. Hunting to extinction: biology and regional economy influence extinction risk and the impact of hunting in artiodactyls. *Proc. R. Soc. B Biol. Sci.* **274**, 1845–1851 (2007).
  38. Carvalho, J. C. & Cardoso, P. Drivers of beta diversity in Macaronesian spiders in relation to dispersal

ability. *J. Biogeogr.* **41**, 1859–1870 (2014).



## Author contributions

FC and PC conceptualized the initial idea of the paper. All authors contributed to the acquisition of the data. FC conducted the formal analysis. FC and PC wrote the first draft of the manuscript, and all authors read, and contributed with suggestions.

# Acknowledgments

F.C. and P.C. were funded by Kone Foundation, Finland, with the project 'Trait-based prediction of extinction risk'.
